# Supplementary material
Source: Springer Nature journal article supplement (https://www.springermedizin.de/resource/supplementary/12943_2010_762_MOESM1_ESM.pdf/9554762)

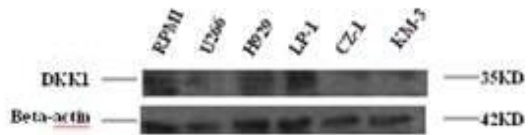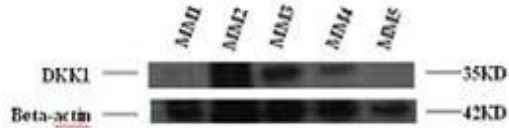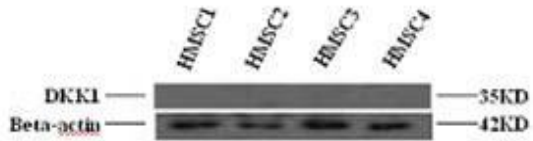

Supplement: MOESM1 [file 9554762]
